# Supplementary material for: The glycan‐dependent ERAD machinery degrades topologically diverse misfolded proteins
Source: PubMed Central journal article supplement (PMC5900737; doi:10.1111/tpj.13851), 2018-03-14
Supplement: TPJ-94-246-s001.pdf [file TPJ-94-246-s001.pdf]

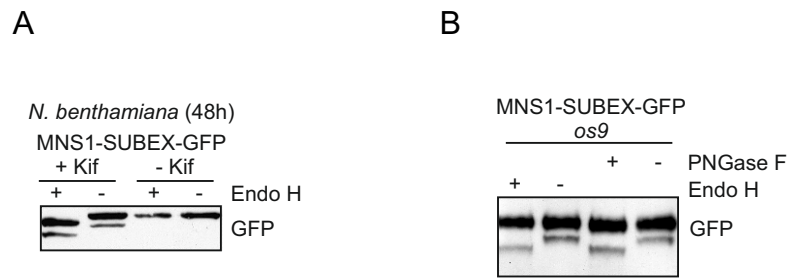

**Figure S1. Endo H and PNGase F digestion of MNS1-SUBEX-GFP.**

**(A)** MNS1-SUBEX-GFP was transiently expressed in *N. benthamiana* in the presence or absence of kifunensine (Kif) and subjected to Endo H digestion. **(B)** MNS1-SUBEX-GFP expressed in *Arabidopsis os9* was subjected to Endo H and PNGase F digestion.

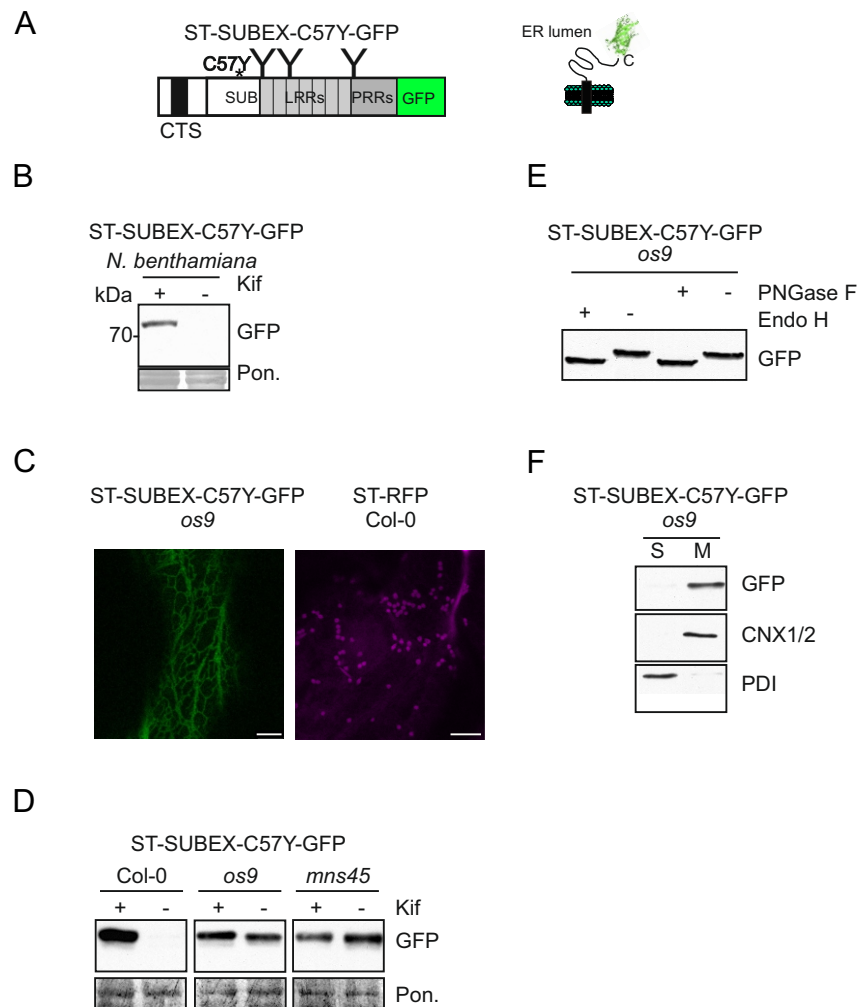

**Figure S2. The ERAD pathway is dominant over Golgi targeting/retention signals from rat  $\alpha 2,6$ -sialyltransferase (ST).**

(A) Schematic illustration of ST-SUBEX-C57Y-GFP. The signal peptide from SP-SUBEX-C57Y-GFP is replaced by the ST-CTS region. (B) Immunoblot of ST-SUBEX-C57Y-GFP transiently expressed in *N. benthamiana* leaves in the presence or absence of 20  $\mu\text{M}$  kifunensine (Kif). Proteins were analysed 48 h after infiltration. (C) Confocal images of 12-day-old *Arabidopsis* seedlings expressing ST-SUBEX-C57Y-GFP. Scale bars = 7.5  $\mu\text{m}$ . (D) Immunoblot analysis of protein extracts from 4-5-week-old *Arabidopsis* expressing ST-SUBEX-C57Y-GFP. (E) Endo H and PNGase F digestion of ST-SUBEX-C57Y-GFP from 4-5-week-old *Arabidopsis*. (F) Detection of ST-SUBEX-C57Y-GFP in soluble (S) and membrane fractions (M) of 12-day-old *os9* seedlings.

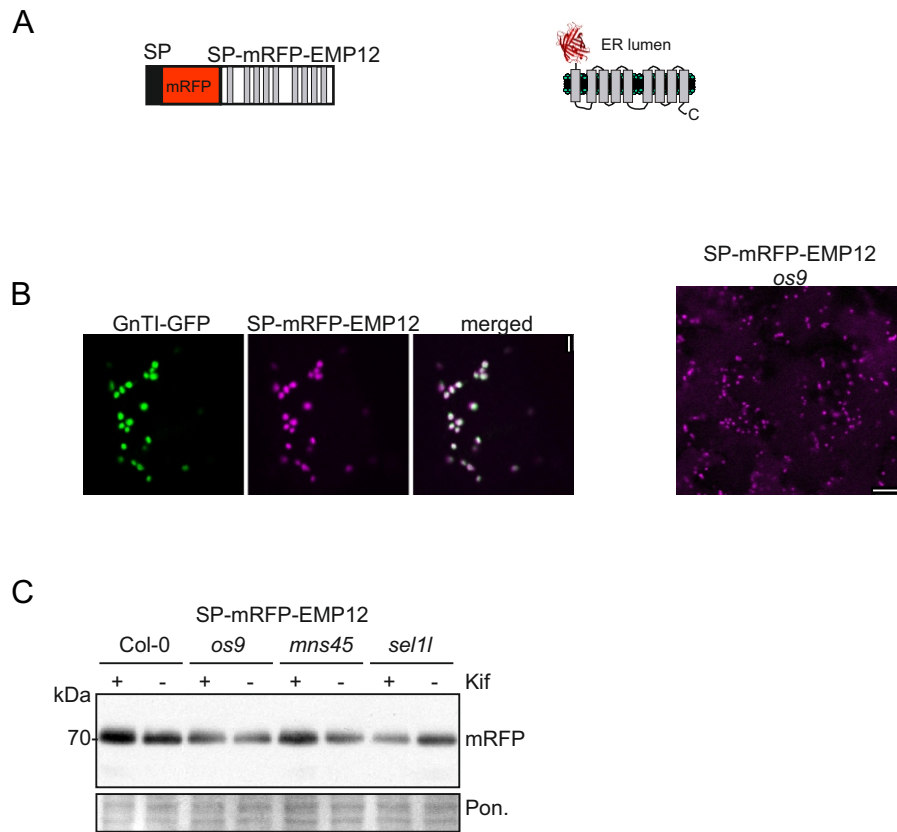

**Figure S3. Golgi localization of SP-mRFP-EMP12.**

(A) Schematic illustration of SP-mRFP-EMP12. The C-terminal part of *Arabidopsis* EMP12 carrying nine transmembrane domains is fused to SP-mRFP. (B) Confocal images of SP-mRFP-EMP12 (48 h after infiltration) transiently expressed in *N. benthamiana* leaves (scale bar = 25  $\mu\text{m}$ ) as well as of *Arabidopsis os9* leaves expressing SP-mRFP-EMP12 (scale bar = 10  $\mu\text{m}$ ). (C) Immunoblot analysis of protein extracts from 4-5-week-old *Arabidopsis* expressing SP-mRFP-EMP12.

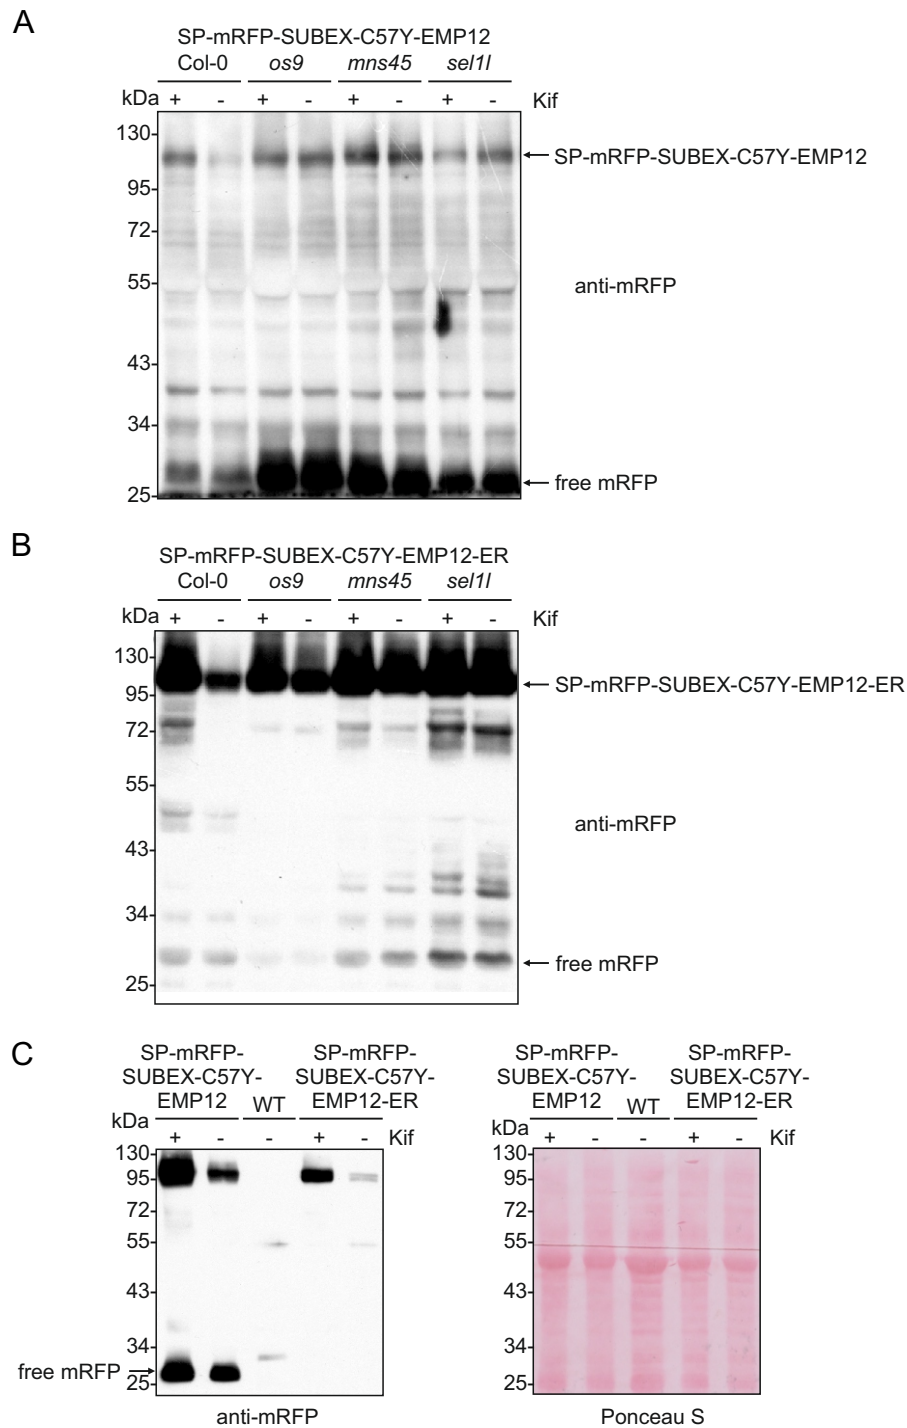

**Figure S4. Detection of free mRFP on immunoblots.**

(A) Immunoblot analysis of transgenic Col-0, *os9*, *mns45* and *sel11* expressing SP-mRFP-SUBEX-C57Y-EMP12. The presence of cleaved free mRFP is indicated. The image corresponds to the one shown in Figure 4b and displays the molecular weight range from 25-130 kDa. (B) Immunoblot analysis of transgenic Col-0, *os9*, *mns45* and *sel11* expressing SP-mRFP-SUBEX-C57Y-EMP12-ER. The presence of cleaved free mRFP is indicated. The image corresponds to the one shown in Figure 5e and displays the molecular weight range from 25-130 kDa. (C) Comparison of Col-0 expressing SP-mRFP-SUBEX-C57Y-EMP12 and Col-0 expressing SP-mRFP-SUBEX-C57Y-EMP12-ER on the same blot. A protein extract from a non-transformed Col-0 WT plant is included as a control.

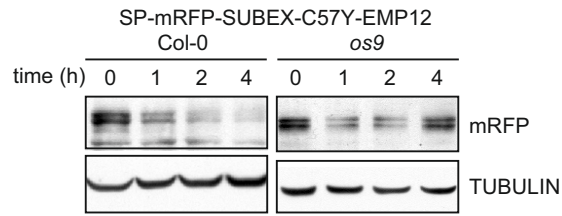

**Figure S5. Degradation of SP-mRFP-SUBEX-C57Y-EMP12 in the presence of cycloheximide (CHX).**

12-day-old *Arabidopsis* wild-type and *os9* seedlings expressing SP-mRFP-SUBEX-C57Y-EMP12 were incubated for the indicated time with 100 µg/ml CHX. Proteins were extracted and subjected to SDS-PAGE followed by immunoblotting with antibodies against RFP and tubulin.

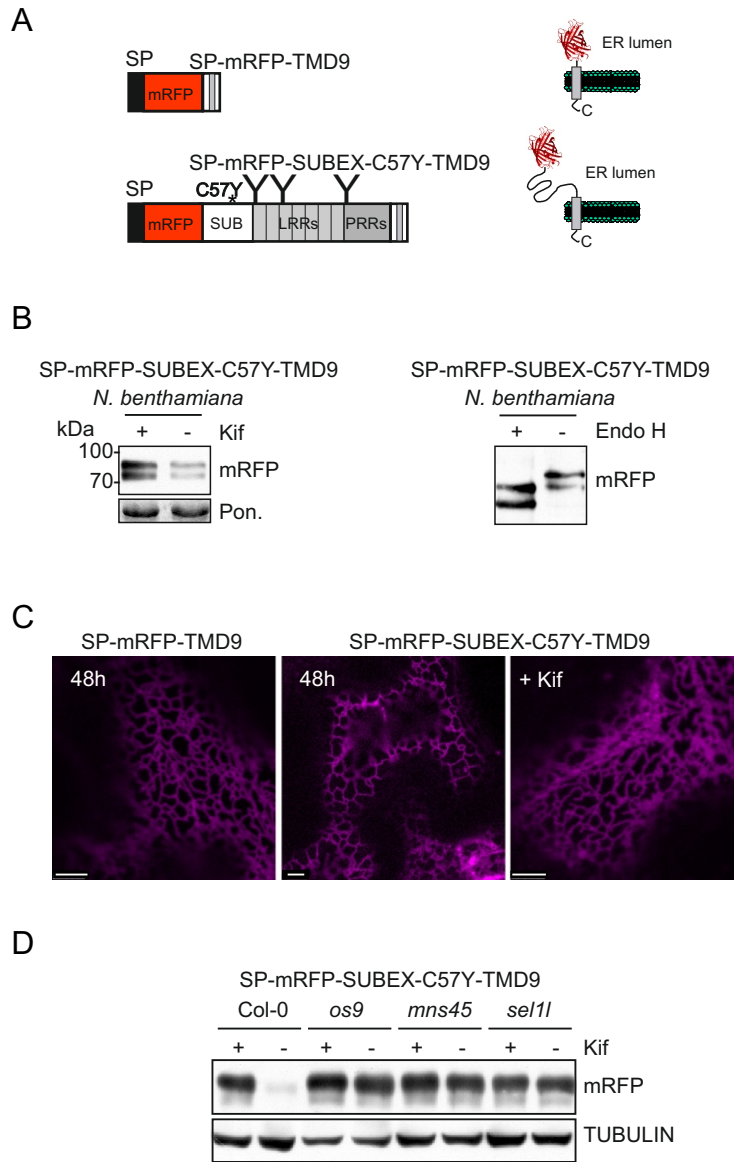

**Figure S6. SP-mRFP-SUBEX-C57Y-TMD9 is retained in the ER and subjected to glycan-dependent ERAD.**

(A) Schematic illustration of SP-mRFP-TMD9 and SP-mRFP-SUBEX-C57Y-TMD9. These chimeric proteins contain the C-terminal region of *Arabidopsis* EMP12 consisting of the last transmembrane domain and the C-terminal Golgi targeting and retention signal that faces the cytosol. (B) Immunoblot analysis of SP-mRFP-SUBEX-C57Y-TMD9 transiently expressed in *N. benthamiana* leaves in the presence or absence of 20  $\mu$ M kifunensine (Kif) and after Endo H digestion. Proteins were analysed 48 h after infiltration. (C) Confocal images of SP-mRFP-TMD9 and SP-mRFP-SUBEX-C57Y-TMD9 (48 h after infiltration) transiently expressed in *N. benthamiana* leaves. Scale bars = 5  $\mu$ m. (D) Immunoblot analysis of protein extracts from 4-5-week-old *Arabidopsis* expressing SP-mRFP-SUBEX-C57Y-TMD9.

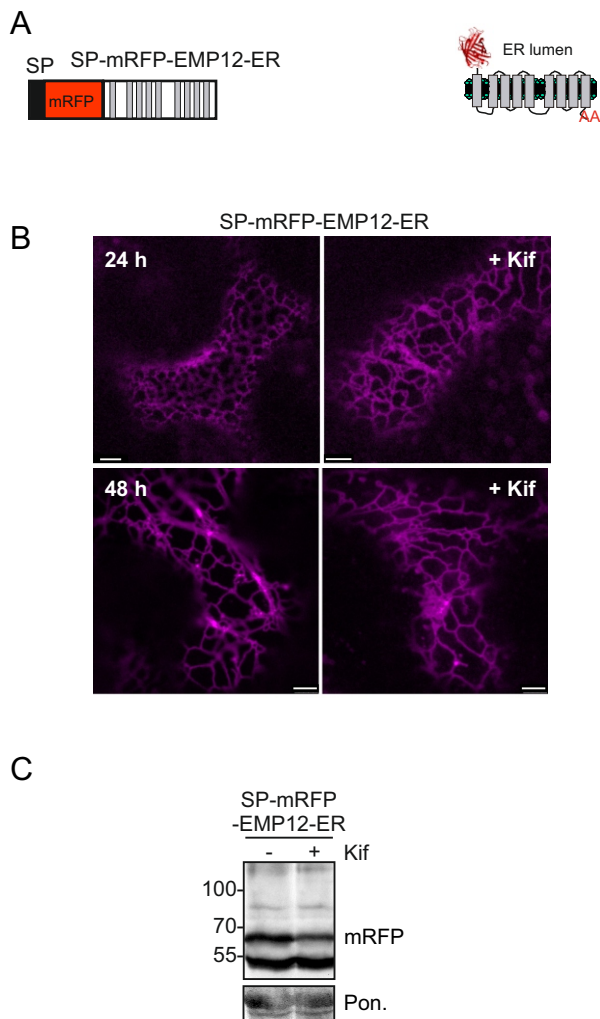

**Figure S7. Subcellular localisation of SP-mRFP-EMP12-ER harbouring mutations in the ER export motif.**

(**A**) Schematic illustration of SP-mRFP-EMP12-ER. The cytoplasmic C-terminal region carries two amino acid substitutions that inactivate the ER export signal of *Arabidopsis* EMP12. (**B**) Confocal images of SP-mRFP-EMP12-ER (24 and 48 h after infiltration) transiently expressed in *N. benthamiana* leaves. Scale bars = 5  $\mu$ m. (**C**) Immunoblot analysis of SP-mRFP-EMP12-ER transiently expressed in *N. benthamiana* leaves in the presence or absence of 20  $\mu$ M kifunensine (Kif) (48 h after infiltration).
