# Supplementary material for: The glycan‐dependent ERAD machinery degrades topologically diverse misfolded proteins
Source: PubMed Central journal article supplement (PMC5900737; doi:10.1111/tpj.13851), 2018-03-14
Supplement: TPJ-94-246-s002.pdf [file TPJ-94-246-s002.pdf]

**Table S1:** List of used primers.

| <b>Name</b> | <b>Sequence (5'-3')</b>                                  |
|-------------|----------------------------------------------------------|
| BRI1_25F    | tataACTAGTTTTCAAGCTTCACCATCTCAGTCT                       |
| BRI1_26R    | tataACTAGTGATTTTGTTCGCTAATCGCTAA                         |
| BRI1_27R    | tataGGATCCTCAGATTTTGTTCGCTAATCGCTA                       |
| CNX1_12F    | tataACTAGTATGAGACAACGGCAACTATTTTCC                       |
| EMP12_6F    | tataGGATCCATCCACTGGTTCTCCATCTTTAAC                       |
| EMP12_7R    | tataCTCGAGCTAGTCGCACTTGATGTTTCTGTAG                      |
| EMP12_10R   | tataCTCGAGCTAGTCGCACTTGATGTTTCTGGCGATCCTCCTTGCAAACAGATTG |
| EMP12_11F   | tataGGATCCGGATTCTTCCAGACAAGCTTC                          |
| mRFP21-R    | tataAGATCTAGCTCTAGAAGCACCAGTAGAATG                       |
| SUB_16R     | tataAGATCTTCTTTGAGTGGACCAGAATTTTCC                       |
| SUB_17F     | tataGGATCCGTTACTAATCTACGAGATGTTTCG                       |
